# Supplementary material
Source: Springer Nature journal article supplement (https://www.springermedizin.de/resource/supplementary/13014_2012_580_MOESM4_ESM.pdf/9634180)

# Urinary HRQOL

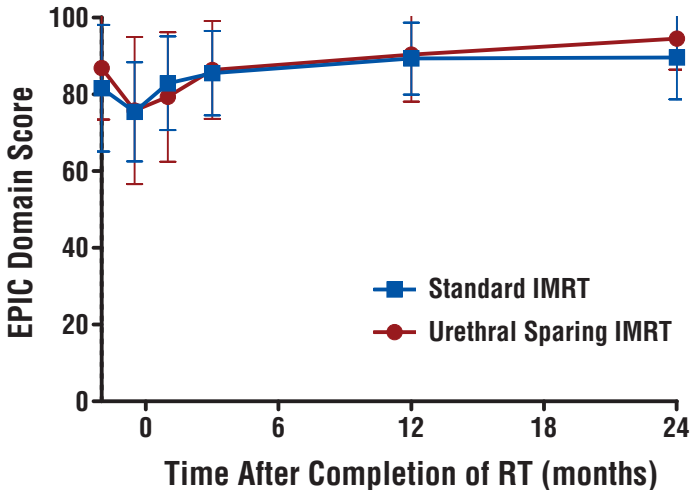

Supplement: MOESM4 [file 9634180]
